# Supplementary material
Source: PubMed Central journal article supplement (PMC1892956)
Supplement: pnas_0610993104_1.pdf [file pnas_0610993104_1.pdf]

ARTKQTARKSTGAKAPPRKQLASKARKSAPATGGIKKPHRFRPGTVALREIRKYQKSTDLLIRKLPFQRLVR

DIHFKAELRFQSASVLAALQEAAEAAYLVGLFEDTNLCAIHARRVTIMTKDMQLARRIRGERF
